# Supplementary material for: Assembly of [V15Sb6O42(H2O)]6− cluster shells into higher dimensional aggregates via weak Sb⋯N/Sb⋯O intercluster interactions and a new polyoxovanadate with a discrete [V16Sb4O42(H2O)]8− cluster shell
Source: Royal Society of Chemistry journal article supplement (doi:10.1039/c2ce25896j), 2012-01-01
Supplement: c2ce25896j.pdf [file c2ce25896j.pdf]

**Assembly of  $[\text{V}_{15}\text{Sb}_6\text{O}_{42}(\text{H}_2\text{O})]^{6-}$  cluster shells in to higher dimensional aggregates via weak  $\text{Sb}\cdots\text{N}/\text{Sb}\cdots\text{O}$  intercluster interactions and a new polyoxovanadate with a discrete  $[\text{V}_{16}\text{Sb}_4\text{O}_{42}(\text{H}_2\text{O})]^{8-}$  cluster**

Elena Antonova, Christian Näther and Wolfgang Bensch\*

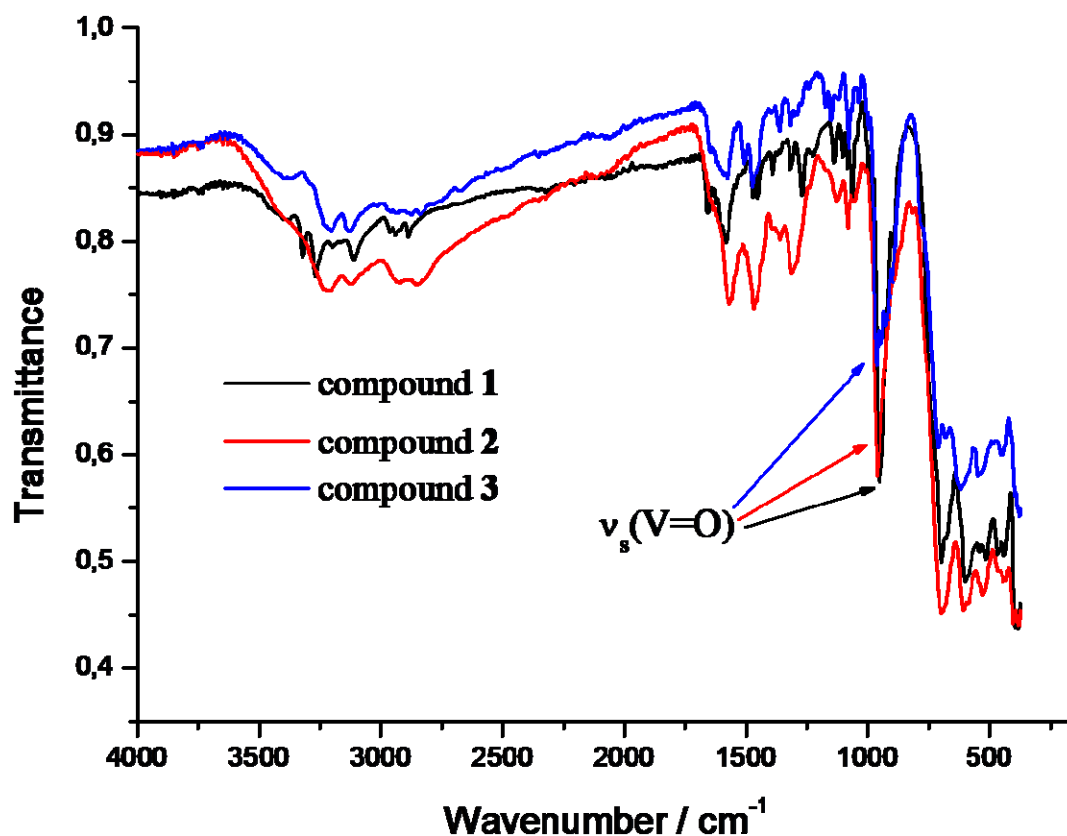

Figure S1: IR spectra of 1, 2 and 3. Some important absorptions modes are marked.

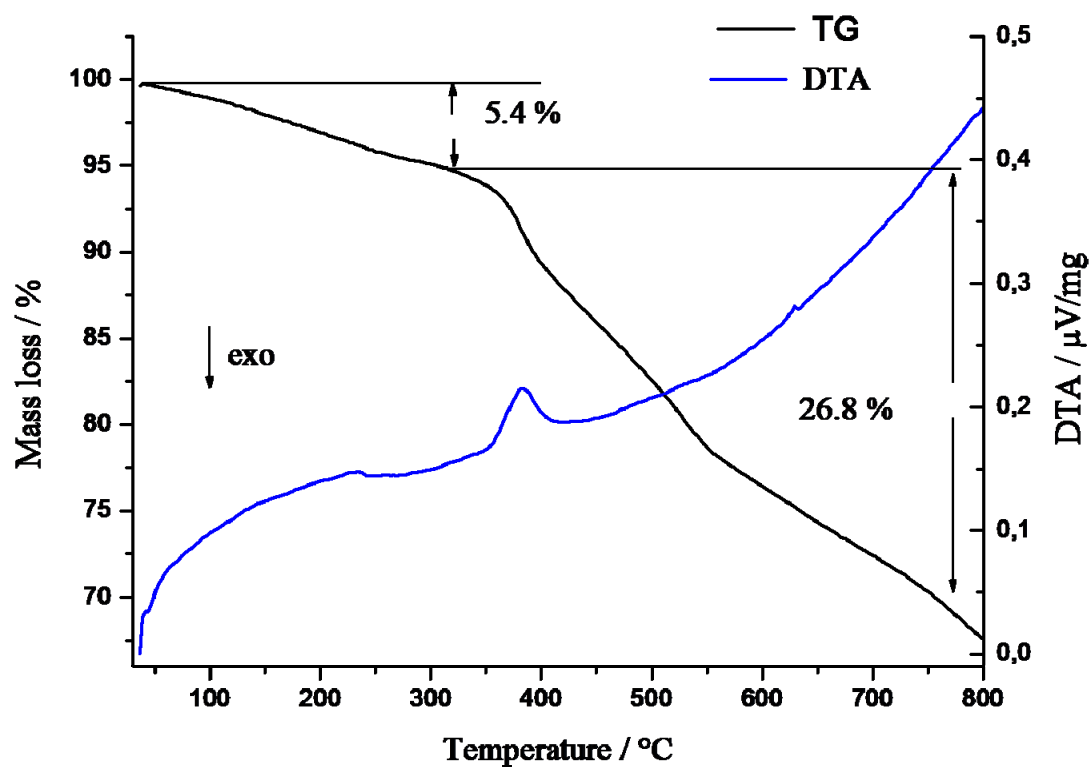

Figure S2: The DTA and TG curves of the thermal decomposition of compound 1.

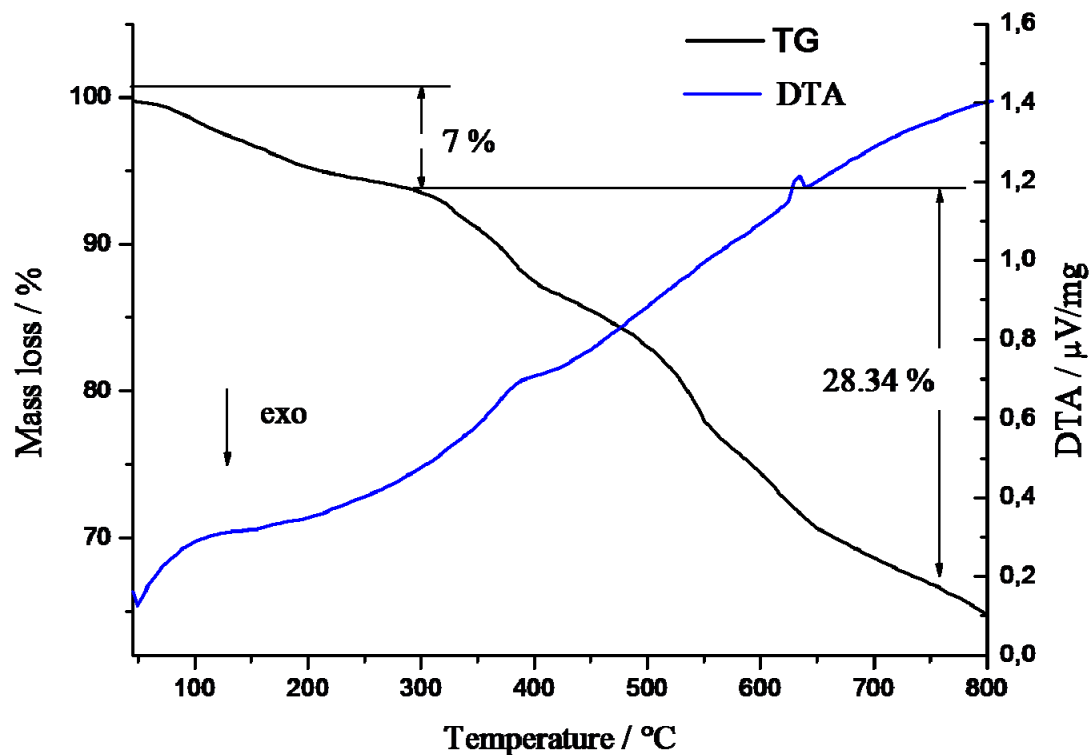

Figure S3: The DTA and TG curves of the thermal decomposition of compound 2.

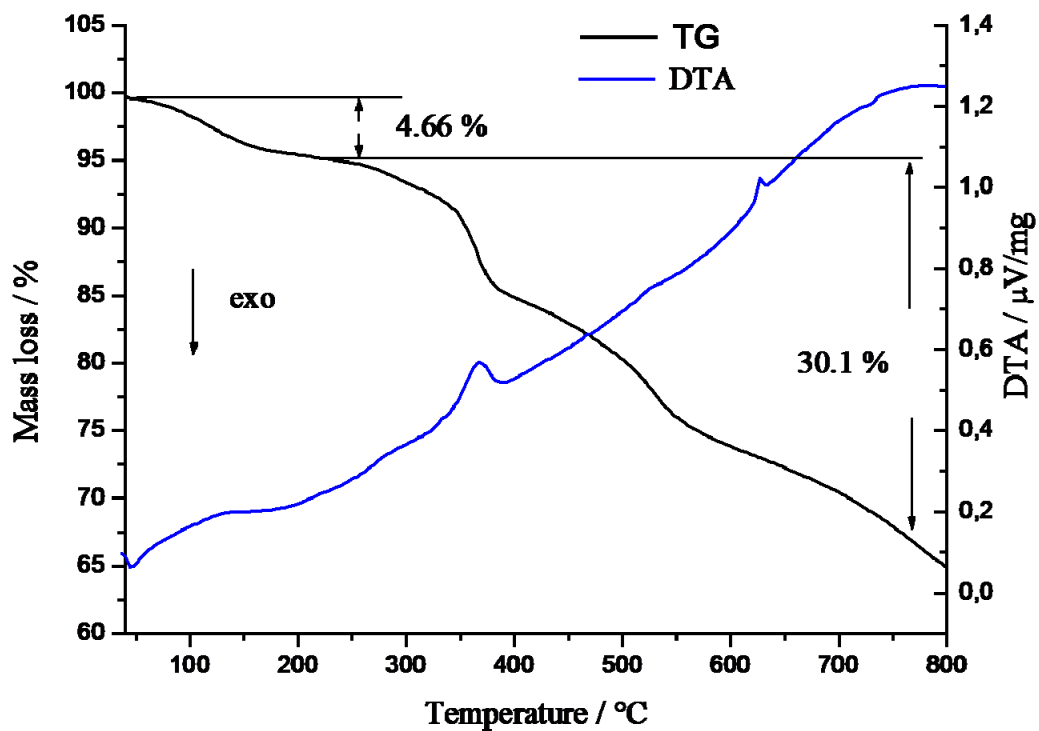

Figure S4: The DTA and TG curves of the thermal decomposition of compound 3.

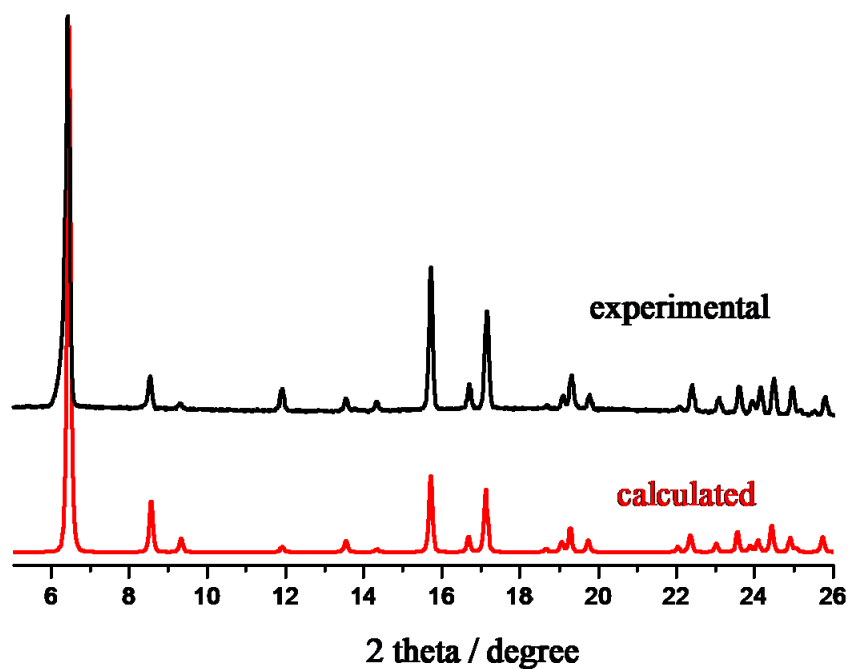

Figure S5: Comparison of measured Powder X-ray diffraction pattern and simulated pattern from single crystal XRD of 1.

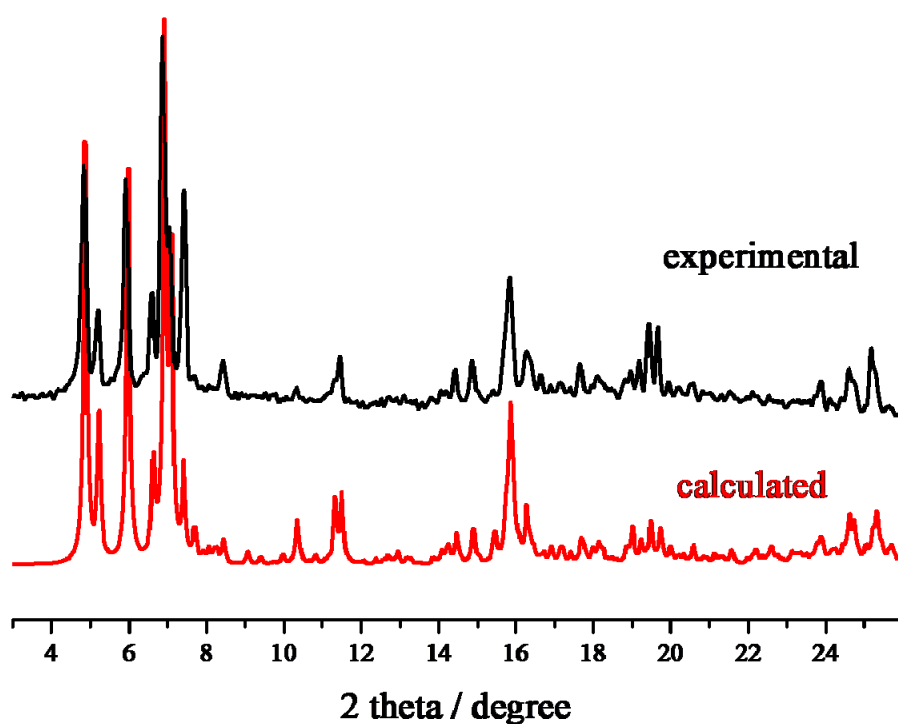

**Figure S6:** Comparison of measured Powder X-ray diffraction pattern and simulated pattern from single crystal XRD of 2.

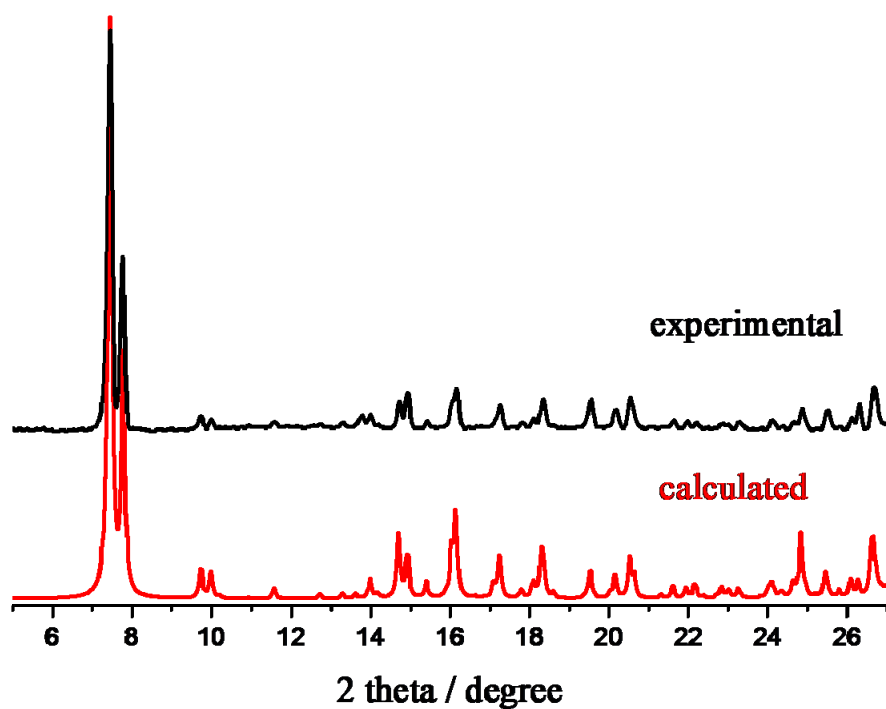

**Figure S7:** Comparison of measured Powder X-ray diffraction pattern and simulated pattern from single crystal XRD of 3.

**Table S1: Bond lengths [Å] of compound 1**

| A-A          | Bond lengths / [Å] | A-A          | Bond lengths / [Å] | A-A           | Bond lengths / [Å] |
|--------------|--------------------|--------------|--------------------|---------------|--------------------|
| V(3)-O(5)    | 1.984(4)           | V(1)-O(7)#1  | 1.936(4)           | Co(1)-N(1)    | 2.224(9)           |
| V(3)-V(4)    | 2.9665(12)         | V(1)-O(9)#2  | 1.970(4)           | Co(2)-N(12)#5 | 2.074(6)           |
| V(4)-O(12)   | 1.624(4)           | V(1)-O(3)    | 2.001(4)           | Co(2)-N(12)#6 | 2.074(6)           |
| V(4)-O(13)   | 1.919(4)           | V(1)-V(2)#2  | 2.8778(12)         | Co(2)-N(12)   | 2.074(6)           |
| V(4)-O(11)   | 1.944(4)           | V(1)-V(2)    | 3.0548(12)         | Co(2)-O(16)   | 2.088(10)          |
| V(4)-O(4)#1  | 1.967(4)           | V(2)-O(8)    | 1.618(4)           | Co(2)-N(11)   | 2.237(10)          |
| V(4)-O(2)#1  | 1.972(4)           | V(2)-O(7)#1  | 1.908(4)           | Co(3)-O(17)   | 2.045(10)          |
| V(4)-V(5)#2  | 2.9214(12)         | V(2)-O(9)    | 1.940(4)           | Co(3)-N(22)   | 2.056(5)           |
| V(4)-V(5)    | 3.0485(12)         | V(2)-O(3)    | 1.963(4)           | Co(3)-N(22)#7 | 2.056(5)           |
| V(5)-O(14)   | 1.609(4)           | V(2)-O(5)    | 1.997(4)           | Co(3)-N(22)#8 | 2.056(5)           |
| V(5)-O(13)   | 1.938(4)           | V(2)-V(1)#1  | 2.8778(12)         | Co(3)-N(21)   | 2.251(9)           |
| V(5)-O(13)#1 | 1.939(4)           | V(2)-V(3)    | 3.0133(13)         | N(1)-C(1)     | 1.479(8)           |
| V(5)-O(11)#1 | 1.987(4)           | V(3)-O(10)   | 1.622(4)           | N(1)-C(1)#3   | 1.479(8)           |
| V(5)-O(4)#1  | 2.009(4)           | V(3)-O(9)    | 1.928(4)           | N(1)-C(1)#4   | 1.479(8)           |
| V(5)-V(4)#1  | 2.9214(12)         | V(3)-O(11)   | 1.940(4)           | N(11)-C(11)   | 1.487(8)           |
| O(2)-V(3)#2  | 1.967(4)           | V(3)-O(2)#1  | 1.967(4)           | N(11)-C(11)#5 | 1.487(8)           |
| O(2)-V(4)#2  | 1.972(4)           | Sb(1)-O(3)   | 1.957(4)           | N(11)-C(11)#6 | 1.487(8)           |
| O(4)-V(4)#2  | 1.967(4)           | Sb(1)-O(2)   | 1.963(4)           | C(1)-C(2)     | 1.461(13)          |
| O(4)-V(5)#2  | 2.009(4)           | Sb(1)-O(1)   | 1.974(4)           | C(2)-N(2)     | 1.498(10)          |
| O(7)-V(2)#2  | 1.908(4)           | Sb(2)-O(5)   | 1.945(4)           | N(21)-C(21)   | 1.485(7)           |
| O(7)-V(1)#2  | 1.936(4)           | Sb(2)-O(1)   | 1.959(4)           | N(21)-C(21)#7 | 1.485(7)           |
| O(9)-V(1)#1  | 1.970(4)           | Sb(2)-O(4)   | 1.976(4)           | N(21)-C(21)#8 | 1.485(7)           |
| O(11)-V(5)#2 | 1.987(4)           | Co(1)-O(15)  | 2.075(10)          | C(11)-C(12)   | 1.507(11)          |
| O(13)-V(5)#2 | 1.939(4)           | Co(1)-N(2)   | 2.080(5)           | C(12)-N(12)   | 1.463(9)           |
| V(1)-O(6)    | 1.614(4)           | Co(1)-N(2)#3 | 2.080(6)           | C(21)-C(22)   | 1.536(10)          |
| V(1)-O(7)    | 1.932(4)           | Co(1)-N(2)#4 | 2.080(5)           | C(22)-N(22)   | 1.475(9)           |

Symmetry transformations used to generate equivalent atoms:

#1 -x+y+1,-x+1,z #2 -y+1,x-y,z #3 -y+1,x-y+1,z  
 #4 -x+y,-x+1,z #5 -y,x-y,z #6 -x+y,-x,z #7 -y+2,x-y+1,z  
 #8 -x+y+1,-x+2,z

**Table S2: Hydrogen bonds of compound 1 with  $H\cdots A < r(A) + 2.000$  Angstroms and  $\langle DHA \rangle > 110$  deg.**

| D-H      | d(D-H) | d(H··A) | $\langle DHA \rangle$ | d(D··A) | A                               |
|----------|--------|---------|-----------------------|---------|---------------------------------|
| N2-H2A   | 0.900  | 2.415   | 135.03                | 3.117   | O8 [ -y+1, x-y+1, z ]           |
| N2-H2A   | 0.900  | 2.636   | 122.24                | 3.208   | O6 [ x, y+1, z ]                |
| N2-H2B   | 0.900  | 2.292   | 133.47                | 2.983   | O8 [ -x+y, -x+1, z ]            |
| N12-H12A | 0.900  | 2.585   | 128.84                | 3.226   | O12 [ x-1, y-1, z ]             |
| N12-H12B | 0.900  | 2.357   | 128.52                | 3.001   | O12 [ -x+y, -x+1, z ]           |
| N12-H12B | 0.900  | 2.643   | 157.69                | 3.493   | O4 [ -y, x-y, z ]               |
| N22-H22A | 0.900  | 2.421   | 127.50                | 3.053   | O12 [ -x+y+2/3, -x+4/3, z+1/3 ] |
| N22-H22B | 0.900  | 2.103   | 165.03                | 2.981   | O14 [ x-1/3, y+1/3, z+1/3 ]     |

**Table S3: Bond lengths [Å] of compound 2**

| A-A          | Bond lengths / Å | A-A         | Bond lengths / Å | A-A         | Bond lengths / Å |
|--------------|------------------|-------------|------------------|-------------|------------------|
| Sb(1)-O(15)  | 1.946(5)         | V(4)-O(21)  | 1.613(6)         | V(12)-V(15) | 3.0493(19)       |
| Sb(1)-O(43)  | 1.960(5)         | V(4)-O(32)  | 1.931(5)         | V(13)-O(34) | 1.625(6)         |
| Sb(1)-O(9)   | 2.013(5)         | V(4)-O(63)  | 1.950(5)         | V(13)-O(25) | 1.931(6)         |
| Sb(1)-N(21)  | 2.594(7)         | V(4)-O(46)  | 1.961(6)         | V(13)-O(29) | 1.946(5)         |
| Sb(2)-O(43)  | 1.964(5)         | V(4)-O(30)  | 2.008(5)         | V(13)-O(47) | 1.952(5)         |
| Sb(2)-O(11)  | 1.965(5)         | V(4)-V(7)   | 2.8934(19)       | V(13)-O(71) | 2.016(6)         |
| Sb(2)-O(75)  | 1.976(5)         | V(4)-V(11)  | 3.0412(18)       | V(13)-V(20) | 2.8938(19)       |
| Sb(3)-O(36)  | 1.940(5)         | V(5)-O(40)  | 1.639(6)         | V(13)-V(17) | 3.046(2)         |
| Sb(3)-O(20)  | 1.954(5)         | V(5)-O(78)  | 1.911(5)         | V(14)-O(13) | 1.611(5)         |
| Sb(3)-O(56)  | 1.966(5)         | V(5)-O(51)  | 1.938(6)         | V(14)-O(52) | 1.925(5)         |
| Sb(4)-O(67)  | 1.946(5)         | V(5)-O(35)  | 1.957(6)         | V(14)-O(3)  | 1.939(5)         |
| Sb(4)-O(56)  | 1.952(5)         | V(5)-O(28)  | 1.959(5)         | V(14)-O(15) | 1.970(5)         |
| Sb(4)-O(76)  | 1.962(6)         | V(5)-V(26)  | 2.9861(19)       | V(14)-O(36) | 1.997(5)         |
| Sb(5)-O(48)  | 1.950(5)         | V(5)-V(6)   | 3.0376(18)       | V(14)-V(27) | 2.9987(18)       |
| Sb(5)-O(1)   | 1.956(6)         | V(6)-O(17)  | 1.624(6)         | V(14)-V(19) | 3.0080(19)       |
| Sb(5)-O(6)   | 1.958(6)         | V(6)-O(78)  | 1.922(5)         | V(15)-O(50) | 1.633(5)         |
| Sb(6)-O(37)  | 1.955(6)         | V(6)-O(24)  | 1.934(5)         | V(15)-O(41) | 1.923(5)         |
| Sb(6)-O(30)  | 1.960(5)         | V(6)-O(72)  | 1.955(5)         | V(15)-O(57) | 1.940(6)         |
| Sb(6)-O(6)   | 1.967(5)         | V(6)-O(35)  | 2.006(5)         | V(15)-O(9)  | 1.961(5)         |
| Sb(7)-O(80)  | 1.950(5)         | V(6)-V(18)  | 2.8641(18)       | V(15)-O(75) | 1.967(5)         |
| Sb(7)-O(79)  | 1.960(5)         | V(7)-O(38)  | 1.620(5)         | V(15)-V(30) | 2.9874(19)       |
| Sb(7)-O(35)  | 1.962(5)         | V(7)-O(63)  | 1.930(5)         | V(16)-O(44) | 1.633(5)         |
| Sb(8)-O(23)  | 1.945(5)         | V(7)-O(46)  | 1.966(5)         | V(16)-O(3)  | 1.920(5)         |
| Sb(8)-O(80)  | 1.954(6)         | V(7)-O(76)  | 1.976(5)         | V(16)-O(63) | 1.933(5)         |
| Sb(8)-O(28)  | 1.961(5)         | V(7)-O(20)  | 1.981(5)         | V(16)-O(39) | 1.942(5)         |
| Sb(9)-O(14)  | 1.955(6)         | V(7)-V(23)  | 3.0312(17)       | V(16)-O(20) | 2.034(6)         |
| Sb(9)-O(60)  | 1.962(6)         | V(7)-V(16)  | 3.0673(18)       | V(16)-V(19) | 2.8127(18)       |
| Sb(9)-O(96)  | 2.019(5)         | V(8)-O(2)   | 1.621(5)         | V(17)-O(58) | 1.622(6)         |
| Sb(10)-O(12) | 1.953(5)         | V(8)-O(41)  | 1.929(5)         | V(17)-O(25) | 1.924(6)         |
| Sb(10)-O(14) | 1.964(5)         | V(8)-O(4)   | 1.931(5)         | V(17)-O(5)  | 1.956(6)         |
| Sb(10)-O(55) | 2.004(5)         | V(8)-O(57)  | 1.950(6)         | V(17)-O(59) | 1.965(6)         |
| Sb(11)-O(64) | 1.945(5)         | V(8)-O(1)   | 2.014(6)         | V(17)-O(71) | 1.972(6)         |
| Sb(11)-O(71) | 1.954(5)         | V(8)-V(15)  | 2.8846(19)       | V(17)-V(24) | 2.8891(19)       |
| Sb(11)-O(95) | 1.964(6)         | V(9)-O(33)  | 1.629(5)         | V(17)-V(26) | 3.015(2)         |
| Sb(12)-O(49) | 1.953(5)         | V(9)-O(4)   | 1.924(5)         | V(18)-O(54) | 1.626(6)         |
| Sb(12)-O(95) | 1.964(6)         | V(9)-O(69)  | 1.936(6)         | V(18)-O(24) | 1.926(6)         |
| Sb(12)-O(59) | 1.971(5)         | V(9)-O(16)  | 1.955(6)         | V(18)-O(72) | 1.962(5)         |
| V(1)-O(8)    | 1.619(6)         | V(9)-O(67)  | 2.005(5)         | V(18)-O(55) | 1.968(6)         |
| V(1)-O(78)   | 1.920(5)         | V(9)-V(27)  | 3.0636(18)       | V(18)-O(60) | 1.993(6)         |
| V(1)-O(65)   | 1.942(5)         | V(10)-O(94) | 1.627(5)         | V(18)-V(28) | 3.0038(17)       |
| V(1)-O(51)   | 1.976(5)         | V(10)-O(70) | 1.911(6)         | V(18)-V(29) | 3.0724(19)       |
| V(1)-O(49)   | 2.013(6)         | V(10)-O(61) | 1.943(5)         | V(19)-O(62) | 1.618(5)         |
| V(1)-V(5)    | 2.8761(18)       | V(10)-O(79) | 1.988(5)         | V(19)-O(39) | 1.922(5)         |
| V(1)-V(21)   | 3.0590(19)       | V(10)-O(23) | 1.992(6)         | V(19)-O(3)  | 1.935(5)         |
| V(2)-O(74)   | 1.615(5)         | V(10)-V(22) | 2.8556(19)       | V(19)-O(15) | 1.981(5)         |
| V(2)-O(4)    | 1.918(6)         | V(10)-V(28) | 3.0170(17)       | V(19)-O(11) | 1.983(5)         |
| V(2)-O(69)   | 1.973(5)         | V(10)-V(24) | 3.0522(19)       | V(20)-O(77) | 1.625(6)         |
| V(2)-O(37)   | 1.988(6)         | V(11)-O(42) | 1.628(6)         | V(20)-O(96) | 1.937(5)         |
| V(2)-O(1)    | 1.996(6)         | V(11)-O(32) | 1.923(5)         | V(20)-O(47) | 1.938(5)         |
| V(2)-V(9)    | 2.8377(19)       | V(11)-O(45) | 1.934(5)         | V(20)-O(29) | 1.943(5)         |

**Continuation of table S3: Bond lengths [Å] of compound 2.**

| A-A         | Bond lengths / Å | A-A         | Bond lengths / Å | A-A         | Bond lengths / Å |
|-------------|------------------|-------------|------------------|-------------|------------------|
| V(2)-V(23)  | 3.0181(18)       | V(21)-O(64) | 1.993(6)         | C(11)-C(12) | 1.498(16)        |
| V(2)-V(8)   | 3.0589(19)       | V(21)-O(49) | 1.998(5)         | C(12)-N(8)  | 1.465(14)        |
| V(3)-O(31)  | 1.618(5)         | V(21)-V(29) | 2.8531(19)       | Co(2)-N(12) | 2.064(7)         |
| V(3)-O(32)  | 1.933(5)         | V(21)-O(22) | 1.943(5)         | Co(2)-N(9)  | 2.076(7)         |
| V(3)-O(45)  | 1.948(5)         | O(50)-Co(1) | 2.243(5)         | Co(2)-N(13) | 2.085(6)         |
| V(3)-O(39)  | 1.958(5)         | Co(1)-N(5)  | 2.094(8)         | Co(2)-N(11) | 2.090(7)         |
| V(3)-O(11)  | 2.003(5)         | Co(1)-N(2)  | 2.130(8)         | Co(2)-N(10) | 2.286(6)         |
| V(3)-V(11)  | 2.8525(18)       | Co(1)-N(4)  | 2.163(10)        | N(9)-C(13)  | 1.488(10)        |
| V(3)-V(19)  | 3.0690(18)       | Co(1)-N(3)  | 2.170(11)        | C(13)-C(14) | 1.528(12)        |
| V(11)-O(30) | 1.957(6)         | Co(1)-N(1)  | 2.173(7)         | C(14)-N(10) | 1.495(11)        |
| V(11)-O(48) | 1.976(5)         | N(1)-C(1)   | 1.465(13)        | N(10)-C(15) | 1.465(11)        |
| V(11)-V(30) | 3.0146(19)       | C(1)-C(2)   | 1.454(18)        | N(10)-C(17) | 1.478(10)        |
| V(12)-O(68) | 1.624(6)         | C(2)-N(4)   | 1.486(17)        | C(15)-C(16) | 1.537(12)        |
| V(12)-O(41) | 1.939(5)         | N(2)-C(3)   | 1.54(3)          | C(16)-N(11) | 1.472(10)        |
| V(12)-O(52) | 1.944(5)         | C(3)-C(4)   | 1.52(3)          | C(17)-C(18) | 1.503(11)        |
| V(12)-O(16) | 1.960(5)         | C(4)-N(4)   | 1.418(14)        | C(18)-N(12) | 1.480(10)        |
| V(12)-O(9)  | 2.017(5)         | N(3)-C(5)   | 1.352(14)        | N(13)-C(19) | 1.480(11)        |
| V(12)-V(27) | 2.8772(17)       | C(5)-C(6)   | 1.437(15)        | C(19)-C(20) | 1.548(12)        |
| V(23)-O(69) | 1.944(5)         | N(4)-C(6)   | 1.633(12)        | C(20)-N(14) | 1.486(10)        |
| V(23)-O(37) | 1.966(5)         | N(5)-C(7)   | 1.471(12)        | N(14)-C(23) | 1.456(12)        |
| V(23)-O(76) | 1.979(5)         | C(7)-C(8)   | 1.522(14)        | C(39)-C(40) | 1.498(13)        |
| V(24)-O(19) | 1.626(5)         | C(8)-N(6)   | 1.484(12)        | C(40)-N(27) | 1.471(11)        |
| V(24)-O(70) | 1.932(5)         | N(6)-C(11)  | 1.460(13)        | N(27)-Co(4) | 2.087(7)         |
| V(24)-O(25) | 1.940(6)         | N(6)-C(9)   | 1.481(15)        | Co(4)-N(31) | 2.072(6)         |
| V(24)-O(5)  | 1.942(6)         | C(9)-C(10)  | 1.47(2)          | Co(4)-N(30) | 2.078(8)         |
| V(24)-O(23) | 2.013(6)         | C(10)-N(7)  | 1.52(3)          | Co(4)-N(29) | 2.081(7)         |
| V(25)-O(66) | 1.607(6)         | N(14)-C(21) | 1.468(12)        | Co(4)-N(28) | 2.255(7)         |
| V(25)-O(29) | 1.943(5)         | C(21)-C(22) | 1.535(12)        | N(28)-C(41) | 1.470(10)        |
| V(25)-O(96) | 1.961(6)         | C(22)-N(15) | 1.470(13)        | N(28)-C(45) | 1.473(11)        |
| V(25)-O(22) | 1.967(6)         | C(23)-C(24) | 1.519(14)        | N(28)-C(43) | 1.493(11)        |
| V(25)-O(64) | 1.989(6)         | C(24)-N(16) | 1.489(11)        | C(41)-C(42) | 1.493(14)        |
| V(26)-O(10) | 1.619(6)         | N(16)-Co(3) | 2.061(7)         | C(42)-N(29) | 1.485(13)        |
| V(26)-O(51) | 1.929(5)         | Co(3)-N(18) | 2.095(8)         | C(43)-C(44) | 1.507(13)        |
| V(26)-O(5)  | 1.952(6)         | Co(3)-N(19) | 2.099(7)         | C(44)-N(30) | 1.457(12)        |
| V(26)-O(28) | 1.978(6)         | Co(3)-N(20) | 2.121(8)         | C(45)-C(46) | 1.512(12)        |
| V(26)-O(59) | 1.978(6)         | Co(3)-N(17) | 2.235(8)         | C(46)-N(31) | 1.508(11)        |
| V(27)-O(97) | 1.619(6)         | N(17)-C(27) | 1.479(11)        | C(47)-C(48) | 1.535(11)        |
| V(27)-O(16) | 1.929(5)         | N(17)-C(25) | 1.486(12)        | C(48)-N(32) | 1.471(11)        |
| V(27)-O(52) | 1.931(6)         | N(17)-C(29) | 1.502(11)        | N(32)-Co(5) | 2.073(6)         |
| V(27)-O(36) | 1.982(5)         | C(25)-C(26) | 1.481(14)        | Co(5)-N(33) | 2.053(7)         |
| V(27)-O(67) | 1.982(5)         | C(26)-N(18) | 1.504(13)        | Co(5)-N(36) | 2.080(7)         |
| V(28)-O(27) | 1.615(6)         | C(27)-C(28) | 1.516(13)        | Co(5)-N(35) | 2.091(7)         |
| V(28)-O(61) | 1.943(5)         | C(28)-N(19) | 1.481(12)        | Co(5)-N(34) | 2.273(6)         |
| V(28)-O(72) | 1.953(5)         | C(29)-C(30) | 1.502(14)        | N(33)-C(49) | 1.472(11)        |
| V(28)-O(55) | 1.967(5)         | C(30)-N(20) | 1.472(14)        | C(49)-C(50) | 1.522(13)        |
| V(28)-O(79) | 1.976(5)         | N(21)-C(31) | 1.442(13)        | C(50)-N(34) | 1.475(11)        |
| V(29)-O(18) | 1.634(5)         | C(31)-C(32) | 1.511(14)        | N(34)-C(53) | 1.472(11)        |
| V(29)-O(24) | 1.920(6)         | C(32)-N(22) | 1.501(15)        | N(34)-C(51) | 1.482(11)        |
| V(29)-O(22) | 1.938(6)         | N(22)-C(35) | 1.445(17)        | C(51)-C(52) | 1.496(13)        |
| V(29)-O(65) | 1.942(5)         | N(22)-C(33) | 1.495(19)        | C(52)-N(35) | 1.471(11)        |
| V(29)-O(60) | 2.007(6)         | C(33)-C(34) | 1.44(2)          | C(53)-C(54) | 1.517(12)        |
| V(30)-O(7)  | 1.612(5)         | C(34)-N(23) | 1.502(18)        | C(54)-N(36) | 1.467(11)        |
| V(30)-O(75) | 1.949(6)         | C(35)-C(36) | 1.552(17)        | Co(6)-N(42) | 2.094(7)         |

**Continuation of table S3: Bond lengths [Å] of compound 2.**

| A-A         | Bond lengths / Å | A-A         | Bond lengths / Å | A-A         | Bond lengths / Å |
|-------------|------------------|-------------|------------------|-------------|------------------|
| V(30)-O(45) | 1.959(5)         | C(36)-N(24) | 1.480(16)        | Co(6)-N(39) | 2.096(11)        |
| V(30)-O(57) | 1.960(6)         | N(25)-C(37) | 1.481(13)        | Co(6)-N(37) | 2.122(12)        |
| V(20)-O(12) | 1.988(5)         | C(37)-C(38) | 1.503(13)        | Co(6)-N(40) | 2.165(11)        |
| V(20)-V(25) | 2.9201(19)       | C(38)-N(26) | 1.473(11)        | Co(6)-N(41) | 2.251(14)        |
| V(20)-V(22) | 3.0784(18)       | N(26)-C(39) | 1.464(10)        | Co(6)-N(38) | 2.262(11)        |
| V(21)-O(53) | 1.622(6)         | N(26)-C(47) | 1.470(11)        | N(37)-C(55) | 1.488(18)        |
| V(21)-O(65) | 1.912(6)         | N(38)-C(57) | 1.492(17)        | C(55)-C(56) | 1.48(2)          |
| C(58)-N(39) | 1.49(2)          | N(38)-C(59) | 1.527(19)        | C(56)-N(38) | 1.452(16)        |
| C(59)-C(60) | 1.577(19)        | C(57)-C(58) | 1.501(19)        | N(41)-C(61) | 1.513(16)        |
| C(60)-N(40) | 1.460(17)        | C(62)-N(42) | 1.496(18)        | C(61)-C(62) | 1.511(16)        |



**Table S4 Hydrogen bonds of compound 2 with  $H\cdots A < r(A) + 2.000$  Angstroms and  $\langle DHA \rangle > 110$  deg.**

| D-H      | d(D-H) | d(H $\cdots$ A) | $\langle DHA \rangle$ | d(D $\cdots$ A) | A                             |
|----------|--------|-----------------|-----------------------|-----------------|-------------------------------|
| N1-H1A   | 0.9    | 2.135           | 169.26                | 3.024           | O86 [ -x+5/2, y-1/2, -z+1/2 ] |
| N1-H1B   | 0.9    | 2.132           | 163.41                | 3.005           | O38 [ -x+5/2, y-1/2, -z+1/2 ] |
| N2-H2C   | 0.9    | 2.491           | 144.82                | 3.268           | O46 [ -x+5/2, y-1/2, -z+1/2 ] |
| N3-H3D   | 0.9    | 2.37            | 145.46                | 3.153           | O89 [ x-1/2, -y+3/2, z-1/2 ]  |
| N5-H5C   | 0.9    | 2.433           | 144.9                 | 3.212           | O7                            |
| N5-H5D   | 0.9    | 2.324           | 113.42                | 2.806           | O26 [ -x+5/2, y-1/2, -z+1/2 ] |
| N7-H7D   | 0.89   | 2.641           | 136.33                | 3.342           | N23 [ -x+5/2, y+1/2, -z+1/2 ] |
| N8-H8C   | 0.89   | 2.511           | 151.62                | 3.321           | O77 [ x, y-1, z ]             |
| N8-H8D   | 0.89   | 2.347           | 113.83                | 2.826           | O14 [ x, y-1, z ]             |
| N8-H8D   | 0.89   | 2.556           | 134.28                | 3.241           | O56 [ -x+5/2, y-1/2, -z+1/2 ] |
| N9-H9C   | 0.9    | 2.529           | 126.07                | 3.145           | O8 [ -x+3, -y+2, -z ]         |
| N9-H9D   | 0.9    | 2.127           | 167.49                | 3.012           | O73 [ x+1/2, -y+5/2, z+1/2 ]  |
| N11-H11C | 0.9    | 2.172           | 150.39                | 2.988           | O33 [ -x+5/2, y+1/2, -z+1/2 ] |
| N11-H11D | 0.9    | 2.573           | 125.64                | 3.182           | O4 [ -x+5/2, y+1/2, -z+1/2 ]  |
| N12-H12C | 0.9    | 1.942           | 165.15                | 2.821           | O68 [ -x+5/2, y+1/2, -z+1/2 ] |
| N12-H12D | 0.9    | 2.229           | 132.67                | 2.915           | O40 [ -x+3, -y+2, -z ]        |
| N13-H13C | 0.9    | 2.492           | 125.01                | 3.097           | O8 [ -x+3, -y+2, -z ]         |
| N13-H13D | 0.9    | 2.27            | 168.32                | 3.157           | O16 [ -x+5/2, y+1/2, -z+1/2 ] |
| N15-H15D | 0.89   | 2.65            | 127.02                | 3.264           | O85 [ -x+5/2, y+1/2, -z-1/2 ] |
| N15-H15E | 0.89   | 2.336           | 162.84                | 3.197           | O97 [ -x+5/2, y+1/2, -z+1/2 ] |
| N16-H16C | 0.9    | 2.117           | 161.57                | 2.984           | O18                           |
| N16-H16D | 0.9    | 2.063           | 160.35                | 2.926           | O97 [ -x+5/2, y+1/2, -z+1/2 ] |
| N18-H18D | 0.9    | 2.043           | 168.67                | 2.931           | O18 [ -x+3, -y+2, -z ]        |
| N19-H19C | 0.9    | 2.357           | 135.11                | 3.062           | O13 [ -x+5/2, y+1/2, -z+1/2 ] |
| N19-H19D | 0.9    | 2.507           | 167.08                | 3.39            | O22                           |
| N20-H20D | 0.9    | 2.531           | 132.63                | 3.209           | O68 [ -x+5/2, y+1/2, -z+1/2 ] |
| N21-H21C | 0.9    | 2.148           | 159.99                | 3.009           | O6 [ -x+5/2, y-1/2, -z+1/2 ]  |
| N21-H21D | 0.9    | 2.251           | 162.75                | 3.122           | O62                           |
| N23-H23C | 0.89   | 2.154           | 135.85                | 2.86            | O89 [ -x+3, -y+1, -z+1 ]      |
| N23-H23D | 0.89   | 2.527           | 152.5                 | 3.342           | N7 [ -x+5/2, y-1/2, -z+1/2 ]  |
| N24-H24C | 0.89   | 2.441           | 131.68                | 3.105           | O80 [ x, y-1, z+1 ]           |
| N25-H25C | 0.89   | 2.15            | 144.85                | 2.923           | O83 [ -x+5/2, y-1/2, -z+1/2 ] |
| N25-H25D | 0.89   | 2.404           | 150.62                | 3.21            | O74                           |
| N27-H27C | 0.9    | 2.127           | 159.9                 | 2.988           | O39 [ -x+5/2, y+1/2, -z+1/2 ] |
| N27-H27D | 0.9    | 2.317           | 115.44                | 2.824           | N26                           |
| N27-H27D | 0.9    | 2.41            | 130.84                | 3.075           | O31 [ -x+5/2, y+1/2, -z+1/2 ] |
| N29-H29C | 0.9    | 2.301           | 137.93                | 3.029           | O34 [ -x+2, -y+2, -z ]        |
| N29-H29D | 0.9    | 2.424           | 138.35                | 3.154           | O21 [ -x+5/2, y+1/2, -z+1/2 ] |
| N29-H29D | 0.9    | 2.629           | 148.67                | 3.43            | O32 [ -x+5/2, y+1/2, -z+1/2 ] |
| N30-H30C | 0.9    | 2.273           | 135.71                | 2.984           | O44 [ -x+5/2, y+1/2, -z+1/2 ] |
| N30-H30C | 0.9    | 2.464           | 148.3                 | 3.264           | O63 [ -x+5/2, y+1/2, -z+1/2 ] |
| N31-H31C | 0.9    | 2.325           | 136.76                | 3.043           | O44 [ x-1/2, -y+3/2, z-1/2 ]  |
| N31-H31D | 0.9    | 2.193           | 154.05                | 3.028           | O77 [ -x+2, -y+2, -z ]        |
| N32-H32C | 0.9    | 2.399           | 160.28                | 3.261           | O47 [ -x+2, -y+2, -z ]        |

**Table S5: Bond lengths [Å] of compound 3**

| A-A           | Bond lengths / Å | A-A          | Bond lengths / Å | A-A           | Bond lengths / Å |
|---------------|------------------|--------------|------------------|---------------|------------------|
| Sb(1)-O(15)   | 1.950(3)         | V(3)-V(6)    | 2.9811(15)       | V(8)-O(2)     | 1.935(3)         |
| Sb(1)-O(11)   | 1.951(3)         | V(3)-V(4)    | 3.0316(9)        | V(8)-O(1)     | 2.017(3)         |
| Sb(1)-O(8)    | 1.955(2)         | V(4)-O(17)   | 1.616(3)         | V(8)-V(8)#1   | 2.7274(13)       |
| Sb(2)-O(10)   | 1.941(2)         | V(4)-O(7)    | 1.916(3)         | O(2)-V(8)#1   | 1.913(3)         |
| Sb(2)-O(1)    | 1.943(3)         | V(4)-O(5)    | 1.932(2)         | O(4)-V(6)#1   | 1.914(2)         |
| Sb(2)-O(15)#1 | 1.943(3)         | V(4)-O(10)#1 | 1.959(3)         | O(6)-V(5)#1   | 1.957(2)         |
| Co(1)-N(3)    | 2.062(3)         | V(4)-O(8)    | 1.960(3)         | O(9)-V(6)#1   | 1.939(3)         |
| Co(1)-N(2)    | 2.084(3)         | V(5)-O(19)   | 1.637(3)         | O(10)-V(4)#1  | 1.959(3)         |
| Co(1)-N(4)    | 2.085(3)         | V(5)-O(3)    | 1.916(3)         | O(10)-V(2)#1  | 2.000(3)         |
| Co(1)-N(5)    | 2.087(3)         | V(5)-O(4)    | 1.916(3)         | O(11)-V(7)#1  | 2.011(3)         |
| Co(1)-N(1)    | 2.222(3)         | V(5)-O(6)#1  | 1.957(2)         | O(11)-V(5)#1  | 2.012(3)         |
| V(1)-O(16)    | 1.629(3)         | V(5)-O(11)#1 | 2.012(3)         | O(15)-Sb(2)#1 | 1.943(3)         |
| V(1)-O(7)     | 1.916(3)         | V(5)-V(6)#1  | 2.9220(9)        | N(1)-C(1)     | 1.470(5)         |
| V(1)-O(4)     | 1.937(3)         | V(5)-V(7)    | 3.0580(10)       | N(1)-C(3)     | 1.474(5)         |
| V(1)-O(3)     | 1.953(3)         | V(6)-O(20)   | 1.642(3)         | N(1)-C(5)     | 1.480(5)         |
| V(1)-O(5)     | 1.965(3)         | V(6)-O(4)#1  | 1.914(2)         | C(1)-C(2)     | 1.505(7)         |
| V(1)-V(4)     | 2.9370(11)       | V(6)-O(9)    | 1.936(3)         | C(2)-N(2)     | 1.476(6)         |
| V(1)-V(5)     | 2.9391(17)       | V(6)-O(9)#1  | 1.939(3)         | C(3)-C(4)     | 1.511(6)         |
| V(2)-O(14)    | 1.608(3)         | V(6)-O(6)    | 1.980(3)         | C(4)-N(3)     | 1.466(6)         |
| V(2)-O(7)     | 1.902(2)         | V(6)-V(5)#1  | 2.9220(9)        | C(5)-C(6)     | 1.495(6)         |
| V(2)-O(12)    | 1.926(3)         | V(6)-V(6)#1  | 2.9609(13)       | C(6)-N(4)     | 1.479(5)         |
| V(2)-O(2)     | 1.973(3)         | V(7)-O(22)   | 1.602(3)         | N(5)-C(7)     | 1.477(5)         |
| V(2)-O(10)#1  | 2.000(3)         | V(7)-O(12)   | 1.932(3)         | C(7)-C(8)     | 1.511(6)         |
| V(2)-V(8)     | 2.9516(16)       | V(7)-O(3)    | 1.953(3)         | C(8)-N(6)     | 1.474(5)         |
| V(2)-V(4)     | 2.9983(10)       | V(7)-O(11)#1 | 2.011(3)         | N(6)-C(9)     | 1.463(5)         |
| V(3)-O(18)    | 1.622(3)         | V(7)-O(1)    | 2.015(3)         | N(6)-C(11)    | 1.464(5)         |
| V(3)-O(5)     | 1.928(2)         | V(7)-V(8)    | 3.0919(9)        | C(9)-C(10)    | 1.517(6)         |
| V(3)-O(9)     | 1.928(3)         | V(8)-O(21)   | 1.631(3)         | C(10)-N(7)    | 1.476(6)         |
| V(3)-O(6)     | 1.956(2)         | V(8)-O(2)#1  | 1.913(3)         | C(11)-C(12)   | 1.523(5)         |
| V(3)-O(8)     | 1.996(2)         | V(8)-O(12)   | 1.919(3)         | C(12)-N(8)    | 1.483(5)         |

Symmetry transformations used to generate equivalent atoms:

#1 -x,y,-z+1/2

**Table S6** Hydrogen bonds of compound 3 with  $H\cdots A < r(A) + 2.000 \text{ \AA}$  and  $\langle DHA \rangle > 110^\circ$

| D-H    | d(D-H) | d(H $\cdots$ A) | $\langle DHA \rangle$ | d(D $\cdots$ A) | $\text{\AA}$            |
|--------|--------|-----------------|-----------------------|-----------------|-------------------------|
| N2-H2C | 0.900  | 2.627           | 155.95                | 3.468           | O19                     |
| N2-H2D | 0.900  | 2.091           | 144.42                | 2.871           | O17 [ -x, -y+1, -z+1 ]  |
| N3-H3C | 0.900  | 1.952           | 162.87                | 2.825           | O21 [ x, y+1, z ]       |
| N3-H3D | 0.900  | 2.309           | 153.88                | 3.142           | O25 [ -x, y, -z+1/2 ]   |
| N3-H3D | 0.900  | 2.644           | 110.26                | 3.074           | O20 [ -x, y, -z+1/2 ]   |
| N4-H4C | 0.900  | 2.028           | 159.70                | 2.889           | O14 [ -x, -y+1, -z+1 ]  |
| N4-H4D | 0.900  | 2.303           | 147.23                | 3.098           | O22 [ x, y+1, z ]       |
| N5-H5C | 0.900  | 2.142           | 170.90                | 3.034           | O16 [ -x, -y+1, -z+1 ]  |
| N5-H5D | 0.900  | 2.367           | 156.40                | 3.212           | O20 [ -x, y, -z+1/2 ]   |
| N7-H7C | 0.890  | 2.095           | 165.56                | 2.965           | O20                     |
| N7-H7D | 0.890  | 2.433           | 147.71                | 3.220           | O21 [ x, y+1, z ]       |
| N7-H7D | 0.890  | 2.527           | 112.03                | 2.978           | O21 [ -x, y+1, -z+1/2 ] |
| N7-H7E | 0.890  | 2.291           | 137.94                | 3.011           | O20 [ -x, y, -z+1/2 ]   |
| N8-H8C | 0.890  | 1.915           | 160.97                | 2.772           | O16                     |
| N8-H8D | 0.890  | 1.950           | 162.71                | 2.813           | O19 [ -x, -y+1, -z+1 ]  |
| N8-H8E | 0.890  | 2.148           | 168.05                | 3.024           | O24                     |
